# Supplementary material
Source: PubMed Central journal article supplement (PMC2892419)
Supplement: NIHMS199947-supplement-1_si_001.pdf [file NIHMS199947-supplement-1_si_001.pdf]

SUPPLEMENTAL INFORMATION

*Discovery and Structure Determination of the Orphan Enzyme Isoxanthopterin Deaminase*

R. S. Hall, R. Agarwal, D. Hitchcock, J. M. Sauder, S. K. Burley, S. Swaminathan, and F. M. Raushel

Table S1: List of genes predicted to possess isoxanthopterin deaminase activity.

|    | Locus tag       | gi        | Organism                                                 |
|----|-----------------|-----------|----------------------------------------------------------|
| 1  | NYSGSRC-9339a   | 145580545 | Unknown environmental sample of the Sargasso Sea         |
| 2  | Bxe_A2016       | 91783796  | <i>Burkholderia xenovorans</i> LB400                     |
| 3  | BgramDRAFT_0187 | 170690211 | <i>Burkholderia graminis</i> C4D1M                       |
| 4  | KPK_2302        | 206579968 | <i>Klebsiella pneumoniae</i> 342                         |
| 5  | KP1_3107        | 238895075 | <i>Klebsiella pneumoniae</i> NTUH-K2044                  |
| 6  | KPN_02032       | 152970581 | <i>Klebsiella pneumoniae</i> subsp. pneumoniae MGH 78578 |
| 7  | HMPREF0023_2011 | 226953181 | <i>Acinetobacter</i> sp. ATCC 27244                      |
| 8  | ACIAD1467       | 50084641  | <i>Acinetobacter</i> sp. ADP1                            |
| 9  | PputW619_2587   | 170721762 | <i>Pseudomonas putida</i> W619                           |
| 10 | PP_3209         | 26989928  | <i>Pseudomonas putida</i> KT2440                         |
| 11 | Bmul_3605       | 161520154 | <i>Burkholderia multivorans</i> ATCC 17616               |
| 12 | BURMUCGD1_3770  | 221209432 | <i>Burkholderia multivorans</i> CGD1                     |
| 13 | H16_A3380       | 113869328 | <i>Ralstonia eutropha</i> H16                            |
| 14 | Bcep18194_B0632 | 78061482  | <i>Burkholderia</i> sp. 383                              |
| 15 | Reut_A3081      | 73542765  | <i>Ralstonia eutropha</i> JMP134                         |
| 16 | BCAM2272        | 206564108 | <i>Burkholderia cenocepacia</i> J2315                    |
| 17 | BBta_1262       | 148252823 | <i>Bradyrhizobium</i> sp. BTAi1                          |
| 18 | BURMUCGD2M_4109 | 221200399 | <i>Burkholderia multivorans</i> CGD2M                    |
| 19 | Pfl01_3434      | 77459656  | <i>Pseudomonas fluorescens</i> Pf0-1                     |
| 20 | Bphyt_7136      | 187921762 | <i>Burkholderia phytofirmans</i> PsJN                    |
| 21 | RALTA_A2835     | 194290915 | <i>Cupriavidus taiwanensis</i>                           |
| 22 | SIAM614_03533   | 118593746 | <i>Stappia aggregata</i> IAM 12614                       |
| 23 | Mmwy1_4101      | 152998097 | <i>Marinomonas</i> sp. MWYL1`                            |
| 24 | NYSGXRC-9236b   | 44611670  | Unknown environmental sample of the Sargasso Sea         |
